# Supplementary material for: New-generation NASA Aura Ozone Monitoring Instrument (OMI) volcanic SO 2 dataset: algorithm description, initial results, and continuation with the Suomi-NPP Ozone Mapping and Profiler Suite (OMPS)
Source: Copernicus journal article supplement (doi:10.5194/amt-10-445-2017), 2017-02-06
Supplement: Supplementary file [file amt-10-445-2017-supplement.pdf]

Supplement of Atmos. Meas. Tech., 10, 445–458, 2017  
<http://www.atmos-meas-tech.net/10/445/2017/>  
doi:10.5194/amt-10-445-2017-supplement  
© Author(s) 2017. CC Attribution 3.0 License.

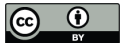

*Supplement of*

**New-generation NASA Aura Ozone Monitoring Instrument (OMI)  
volcanic SO<sub>2</sub> dataset: algorithm description, initial results, and  
continuation with the Suomi-NPP Ozone Mapping and Profiler  
Suite (OMPS)**

**Can Li et al.**

*Correspondence to:* Can Li (can.li@nasa.gov)

The copyright of individual parts of the supplement might differ from the CC-BY 3.0 licence.

## Supplemental Information

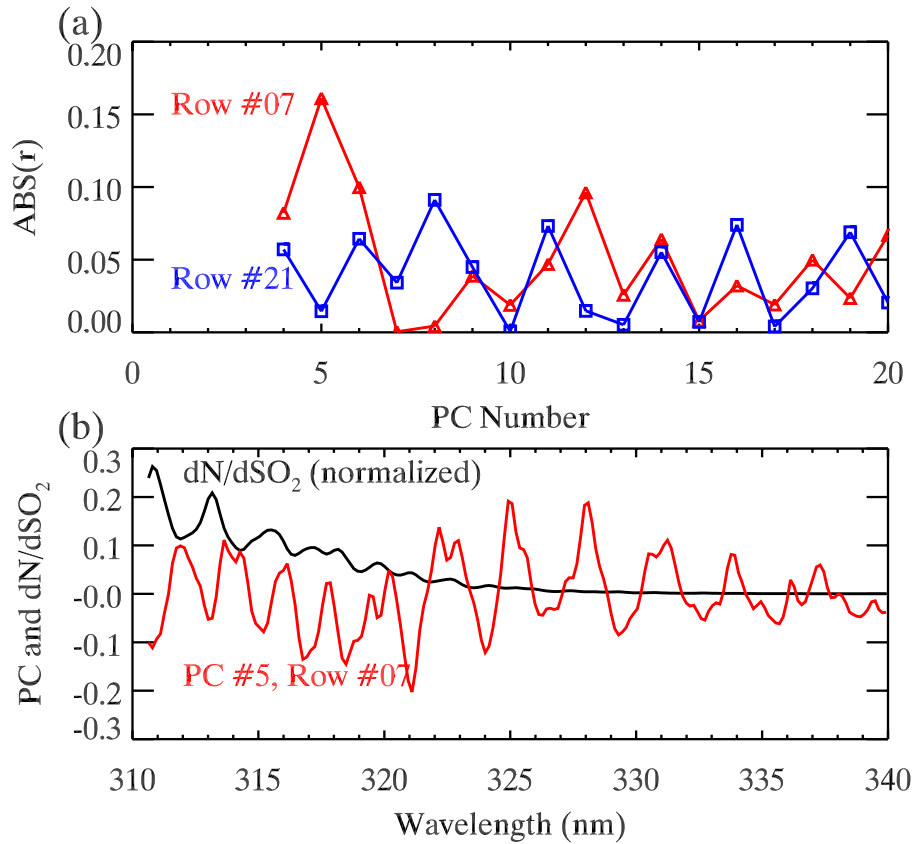

**Figure S1.** (a) The absolute value of correlation coefficients between a normalized  $SO_2$  Jacobians spectrum and PCs (No. 4-20) derived from two OMIs rows, one with pixels inside the Kasatochi plume (Row #07, orbit 21635) and the other outside of the plume (Row #21). Only PC No. 5 from Row #07 is correlated with the Jacobians at the 95% confidence level. As a result, only the first 4 PCs were used in the first step fitting for initial  $SO_2$  estimates for Row #07, whereas for Row #21, all 20 PCs could be used (with 6 being used in the actual first step fitting). (b) A comparison between the  $SO_2$  Jacobians and PC No. 5 from Row #07 reveals  $SO_2$  absorption signature in the PC, particularly for wavelengths < 318 nm.

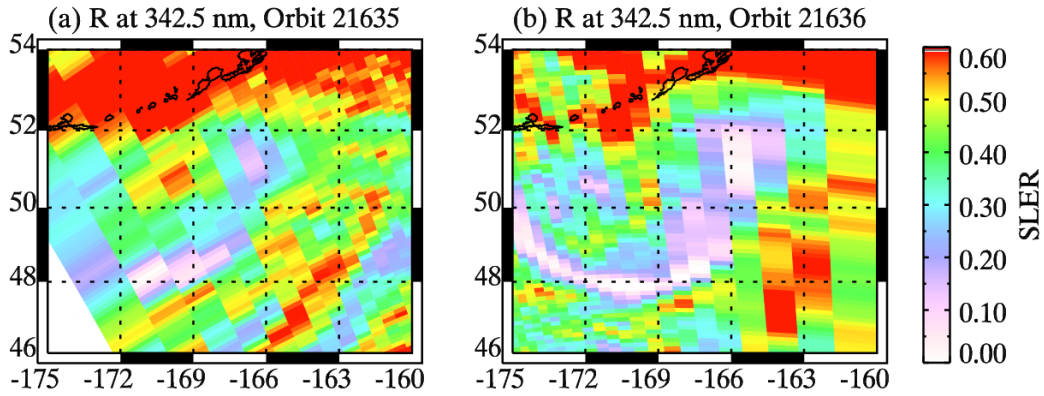

**Figure S2.** SLER at 342.5 nm derived from (a) OMI orbit 21635 on August 8, 2008 and (b) orbit 21636 on August 9, 2008, for the volcanic plume from the Kasatochi eruption.

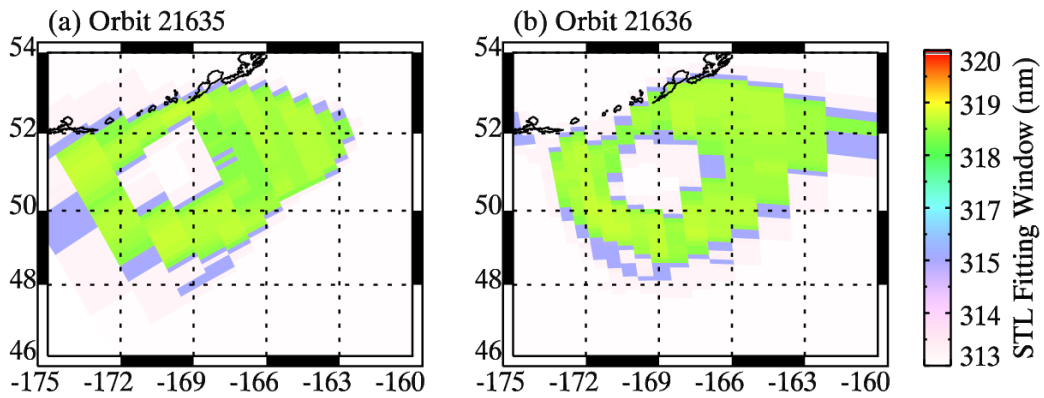

**Figure S3.** The left edge of the fitting window used in STL retrievals for (a) OMI orbit 21635 on August 8, 2008 and (b) orbit 21636 on August 9, 2008.

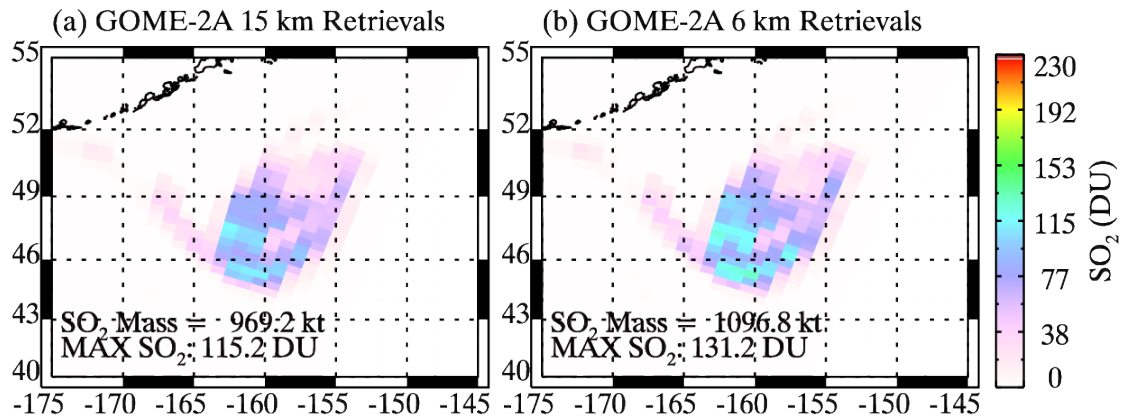

**Figure S4.** The GDP 4.7 (GOME Data Processor) operational GOME-2A SO<sub>2</sub> retrievals for the Kasatochi plume on August 9, 2008 assuming (a) a plume height of 15 km and (b) a plume height of 6 km. The estimated maximum SO<sub>2</sub> (115 DU for 15-km retrievals and 131 DU for 6-km retrievals) is much smaller than both OMI PCA (260 DU) and LF (246) STL retrievals for the same day. But this is expected given the larger pixel size of GOME-2 ( $80 \times 40 \text{ km}^2$ ). The overall SO<sub>2</sub> loading from the GOME-2A 15-km retrievals is greater than OMI PCA STL (18-km) retrievals and smaller than PCA TRU (13-km) retrievals. The SO<sub>2</sub> mass estimated from GOME-2A 6-km retrievals, on the other hand, is only slight greater than that from 15-km retrievals. This weak dependence on assumed plume height is similar to the OMI LF retrievals and may be due to signal saturation at shorter wavelengths.

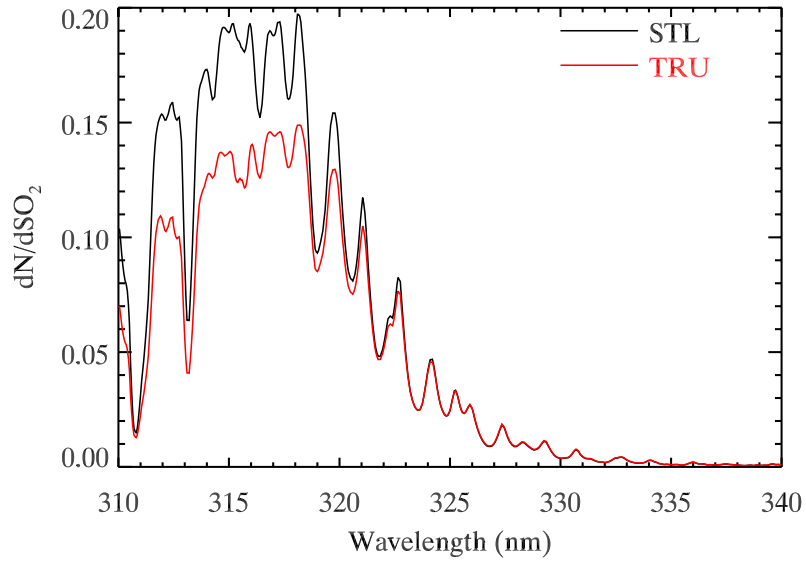

**Figure S5.** SO<sub>2</sub> Jacobians calculated with VLIDORT for typical conditions within the Kasatochi volcanic plume (O<sub>3</sub> = 325 DU, SO<sub>2</sub> = 250 DU, SZA = 35°, VZA = 50°, RAZ = 60°, constant SLER = 0.4) assuming STL (black line) and TRU (red line) SO<sub>2</sub> profiles.

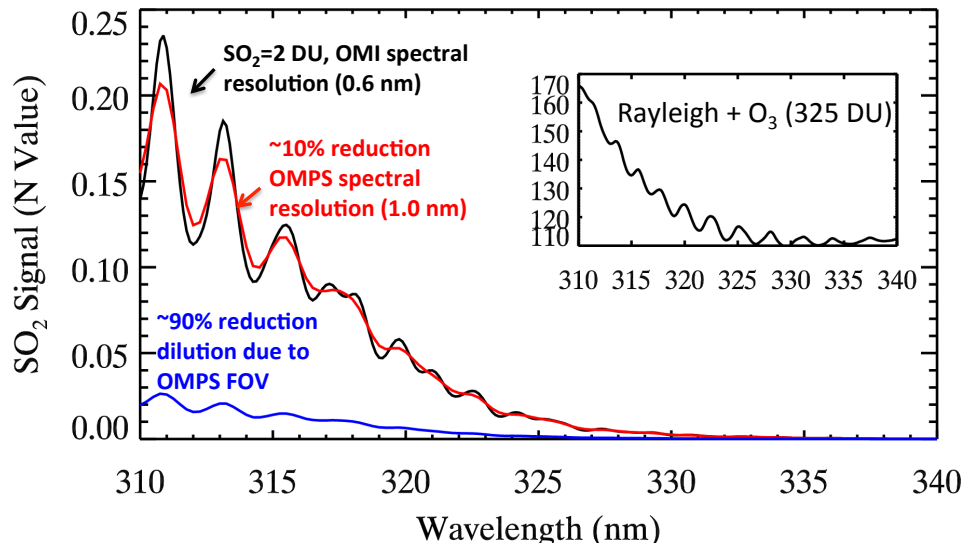

**Figure S6.** For relatively small  $\text{SO}_2$  sources such as power plants and degassing volcanoes, typical  $\text{SO}_2$  signal (in N value) for OMI (black line) is much smaller as compared with the signal for Rayleigh scattering and  $\text{O}_3$  absorption (the insert). The calculation for the Rayleigh and  $\text{O}_3$  only case assumes a mid-latitude  $\text{O}_3$  profile with  $\text{O}_3 = 325$  DU, surface pressure = 1012.35 hPa, SZA =  $30^\circ$ , VZA =  $0^\circ$ , RAZ =  $90^\circ$ , R = 0.05. The calculation for  $\text{SO}_2$  assumes the same conditions, but includes 2 DU of  $\text{SO}_2$  in the PBL. For this particular case, the coarser spectral resolution of OMPS leads to about  $\sim 10\%$  reduction in  $\text{SO}_2$  signal (red line, with  $\text{SO}_2 = 2$  DU). If the  $\text{SO}_2$  plume is isolated and has the size of an OMI pixel, the several times larger OMPS pixel may lead to even greater reduction in the expected  $\text{SO}_2$  signal (blue line, assuming average  $\text{SO}_2 = 0.25$  DU in the OMPS pixel).

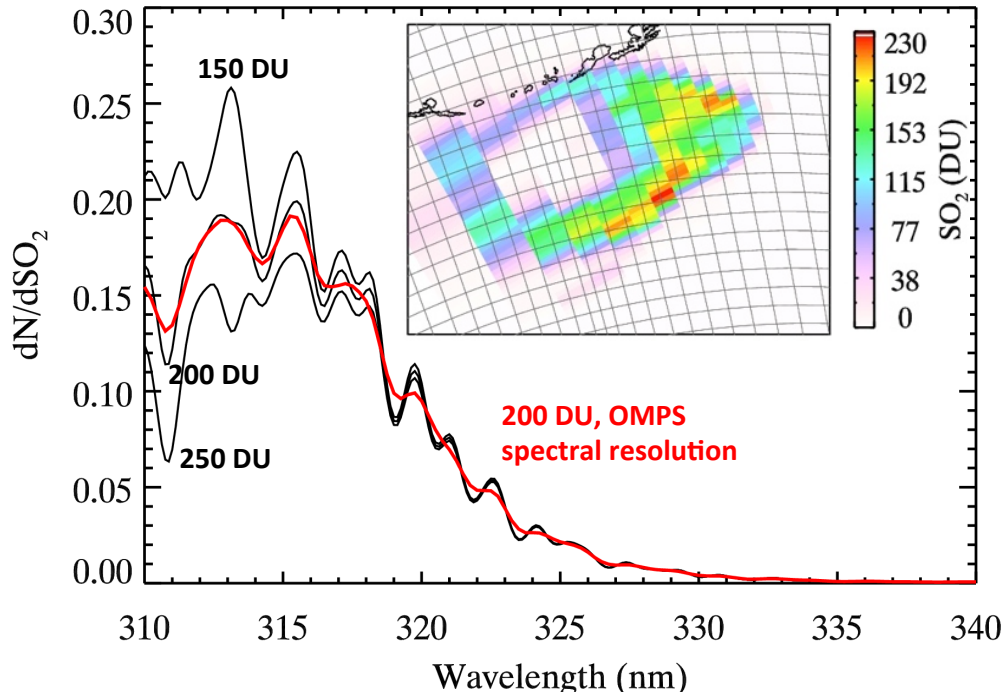

**Figure S7.** (Insert) Typical OMPS footprints overlaid on the OMI PCA STL retrievals of the Kasatochi plume on August 8, 2008 (orbit 21635), indicating substantial variability in OMI  $SO_2$  within a single OMPS pixel, had the plume also been observed by OMPS. For a hypothetical case in which the average  $SO_2$  loading in an OMPS pixel is 200 DU while OMI  $SO_2$  ranges from 150 DU to 250 DU, the  $SO_2$  Jacobians for OMPS (red line) and OMI (black lines) have very different shapes, particularly for wavelengths  $< 315$  nm. As a result, the saturation issue will have different effects on OMI and OMPS retrievals and needs to be properly treated for both instruments.

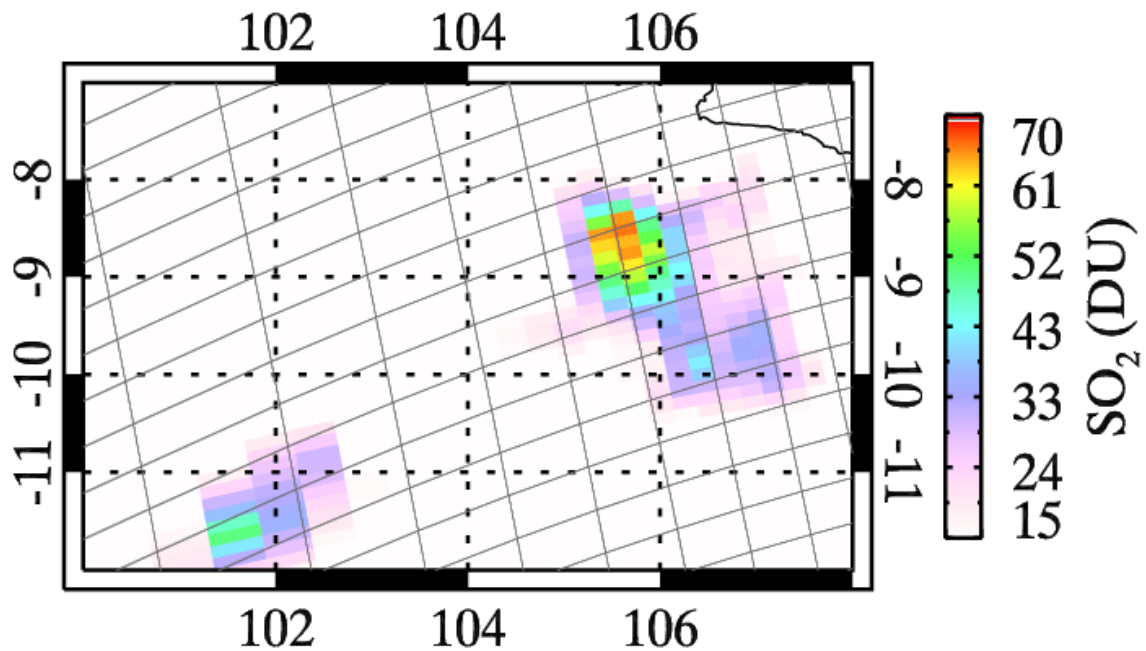

**Figure S8.** OMPS pixels (gray lines) overlaid on OMI retrieved volcanic SO<sub>2</sub> plume from the Kelut eruption on February 14, 2014. For the part of the plume with relatively large OMI SO<sub>2</sub> loading (near 8.5°N, 105.5°E), there are typically several OMI pixels within each OMPS pixel. OMI SO<sub>2</sub> amounts also change substantially within each OMPS pixel, from ~20 DU to nearly 70 DU. The maximum SO<sub>2</sub> retrieved from OMPS would therefore be smaller than OMI, even if the measurements had been made at the same time by the two instruments.
